# Supplementary material for: First Clinical Study on Long-Acting Growth Hormone Therapy in Children with Turner Sydrome
Source: PubMed Central journal article supplement — Horm Metab Res. 2022 Jun 13;54(6):389–95. doi: 10.1055/a-1842-0724 (PMC9192150; doi:10.1055/a-1842-0724), 2022-06-13
Supplement: 10-1055-a-1842-0724-i2021-12-0355.pdf [file 10-1055-a-1842-0724-i2021-12-0355.pdf]

## Supplementary material

**Table 1S . Post hot analysis of  $\Delta$ HtSDS, HV was performed with the Bonferroni's adjustment.**

|                                 | Mean Diff | 95.00% CI of diff | Significant | Adjusted P Value |
|---------------------------------|-----------|-------------------|-------------|------------------|
| <b>HV</b>                       |           |                   |             |                  |
| group 1 vs. group 2             | -1.5      | -3.14 to 0.16     | ns          | 0.10             |
| group 1 vs. group 3             | -0.9      | -2.85 to 1.09     | ns          | >0.9999          |
| group 1 vs. group 4             | 2.1       | 0.13 to 4.09      | *           | 0.03             |
| group 2 vs. group 3             | 0.6       | -1.22 to 2.44     | ns          | >0.9999          |
| group 2 vs. group 4             | 3.6       | 1.77 to 5.43      | ****        | <0.0001          |
| group 3 vs. group 4             | 3.0       | 0.86 to 5.12      | **          | 0.0018           |
| <b><math>\Delta</math>HtSDS</b> |           |                   |             |                  |
| group 1 vs. group 2             | -0.2      | -0.64 to 0.15     | ns          | 0.57             |
| group 1 vs. group 3             | -0.4      | -0.85 to 0.12     | ns          | 0.28             |
| group 1 vs. group 4             | 0.4       | -0.05 to 0.90     | ns          | 0.11             |
| group 2 vs. group 3             | -0.1      | -0.57 to 0.33     | ns          | >0.9999          |
| group 2 vs. group 4             | 0.7       | 0.23 to 1.11      | ***         | 0.0006           |
| group 3 vs. group 4             | 0.8       | 0.26 to 1.31      | ***         | 0.0007           |

HV: height velocity.  $\Delta$ HtSDS: change in HtSDS from baseline.

ns: no significance.

**Table 2S. Multivariate correlation analysis between  $\Delta$ HtSDS, HV at year 1 and baseline variables in LAGH treatment group.**

|                  | $\Delta$ HtSDS |                |        | HV    |                |         |
|------------------|----------------|----------------|--------|-------|----------------|---------|
|                  | r              | r (95%CI)      | p      | r     | r (95%CI).     | p       |
| <b>GH dose</b>   | 0.33           | 0.04 to 0.56   | 0.02   | 0.36  | 0.06 to 0.59   | 0.01    |
| <b>CA (year)</b> | -0.32          | -0.55 to -0.03 | 0.03   | -0.67 | -0.80 to -0.47 | <0.0001 |
| <b>BA</b>        | -0.54          | -0.72 to -0.28 | 0.0002 | -0.71 | -0.83 to -0.51 | <0.0001 |
| <b>BMI</b>       | -0.08          | -0.33 to 0.18  | 0.55   | -0.36 | 0.59 to -0.07  | 0.02    |
| <b>HtSDS</b>     | 0.18           | -0.11 to 0.44  | 0.24   | 0.33  | 0.03 to 0.57   | 0.03    |
| <b>MPH SDS</b>   | 0.09           | -0.19 to 0.37  | 0.54   | 0.15  | -0.12 to 0.40  | 0.25    |

HV: height velocity;  $\Delta$ HtSDS: change in HtSDS from baseline; CA: chronological age; BA: bone age; BMI: body mass index; MPH: mid-parental height; SDS: standard deviation score.
